# Supplementary material
Source: PubMed Central journal article supplement (PMC7163943)

## Supporting Information

### **Fig. S1. Confocal microscopy of cancer cells incubated with cystatin C**

The cells were incubated with 5  $\mu$ M Alexa-568 labelled cystatin C and the nuclei were stained with Sytox Green Nucleic Acid Stain, essentially following procedures detailed in “Experimental procedures”. (A) MCF-7 cells (4 h incubation). (B) A-431 cells (2 h incubation).

### **Fig. S2. Immunolabelling of cystatin C in A-431 cells by a specific polyclonal rabbit antiserum**

Approx. 20,000 A-431 cells were seeded on cover slips in a 6-well culture plate and incubated three days to reach 50-70% confluence. The cells were washed twice with PBS before addition of (A) PBS or (B) an equal volume of 5  $\mu$ M unlabelled cystatin C. The cells were incubated 5 h and fixed with 4% paraformaldehyde. Unspecific binding was blocked using 0.2% bovine serum albumin prior to incubation with polyclonal rabbit-anti-human cystatin C antibodies. The secondary antibody used was goat-anti-rabbit-Alexa-568.

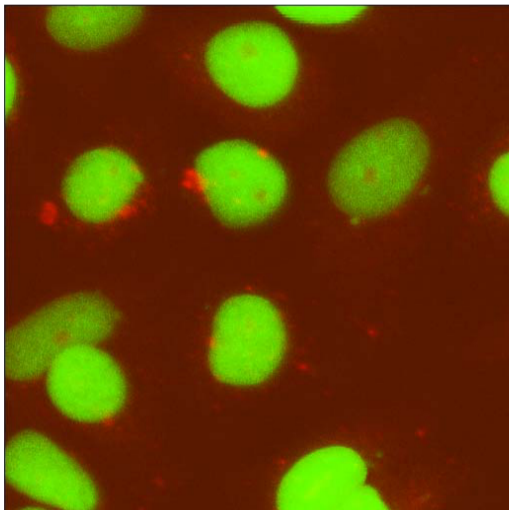

**A**

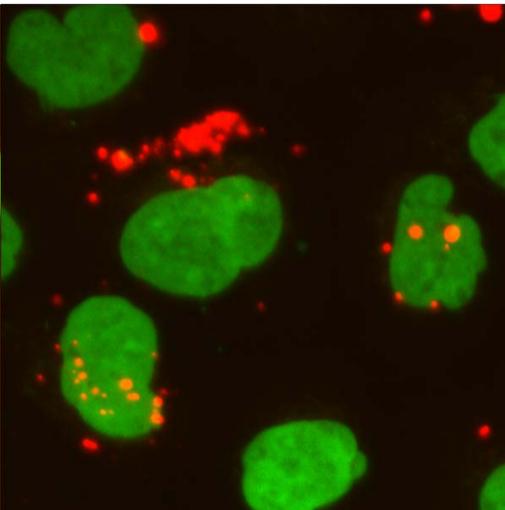

**B**

A

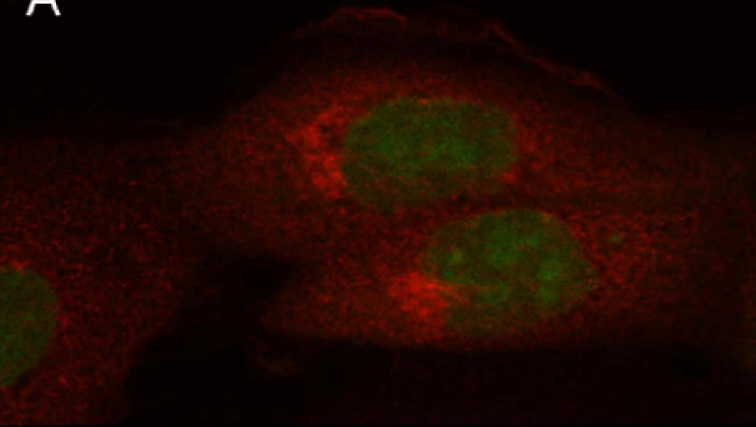

B

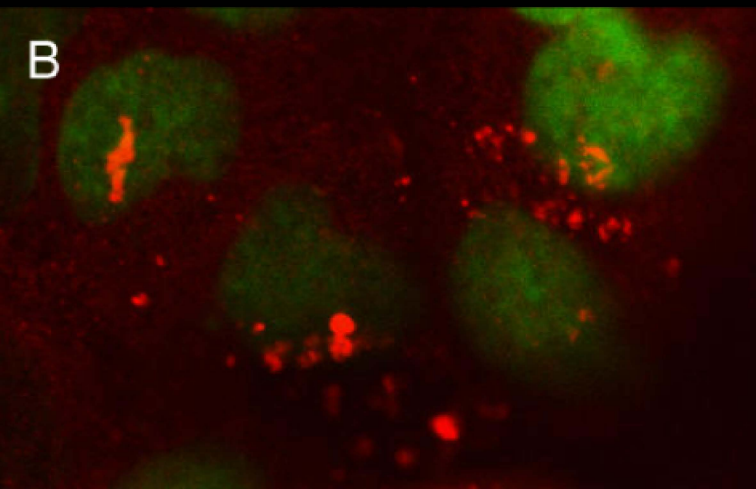

Supplement: FEBS-275-4571-s002.pdf [file FEBS-275-4571-s002.pdf]
